# Supplementary material
Source: HighWire-hosted journal article supplement (https://jnm.snmjournals.org/highwire/filestream/95343/field_highwire_adjunct_files/0/213231_Supplemental_Data.pdf)
Supplement: 213231_Supplemental_Data.pdf [file 213231_Supplemental_Data.pdf]

**Supplemental Figure 1**

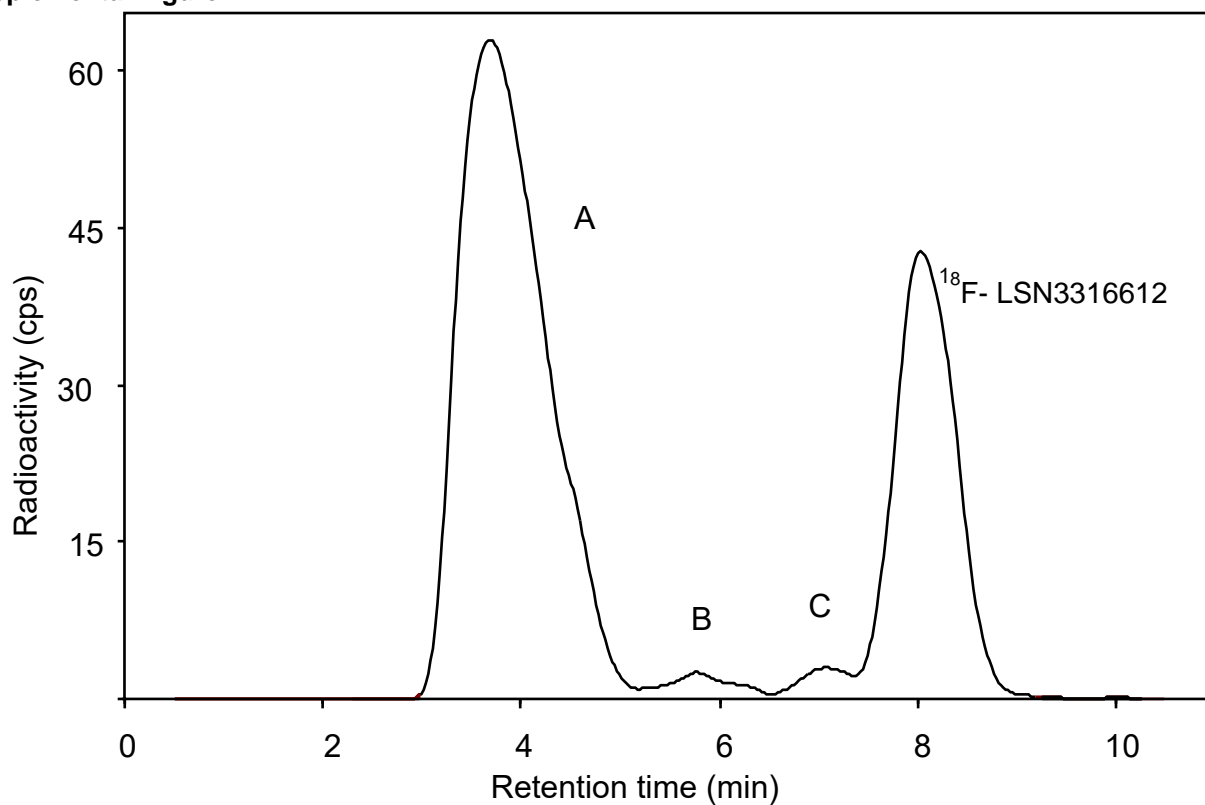

**Supplemental Figure 1.** High performance liquid chromatography (HPLC) chromatogram of radioactivity extracted from monkey plasma 120 minutes after injection of <sup>18</sup>F-LSN3316612. The parent radioligand <sup>18</sup>F-LSN3316612 (right peak) accounted for 31% of all radioactivity. The major radiometabolite peak A (which may represent three unresolved compounds) accounted for 65% of all radioactivity and eluted much earlier than <sup>18</sup>F-LSN3316612. Two minor radiometabolite peaks (B and C) each accounted for only 2% of all radioactivity.

## Supplemental Figure 2

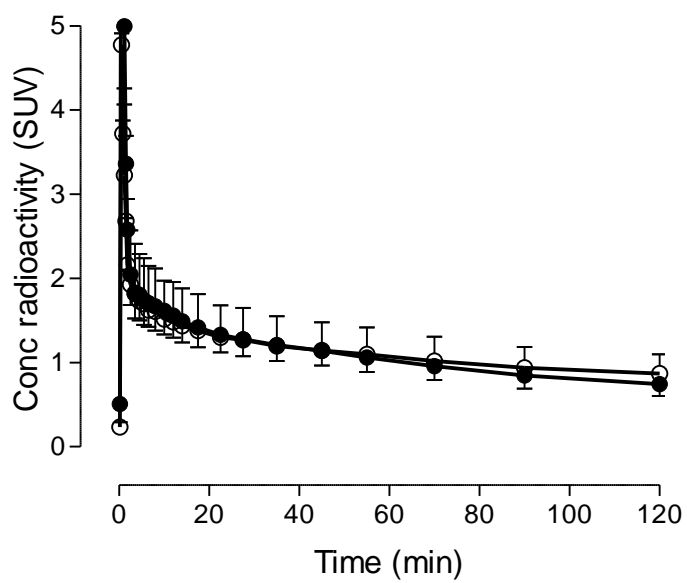

**Supplemental Figure 2.** The uptake of radioactivity in heart from two control mice (○) was the same as that from four *Oga*<sup>ΔBr</sup> mice (●), in which loss of OGA expression was exclusive to the brain.

**Supplemental Figure 3**

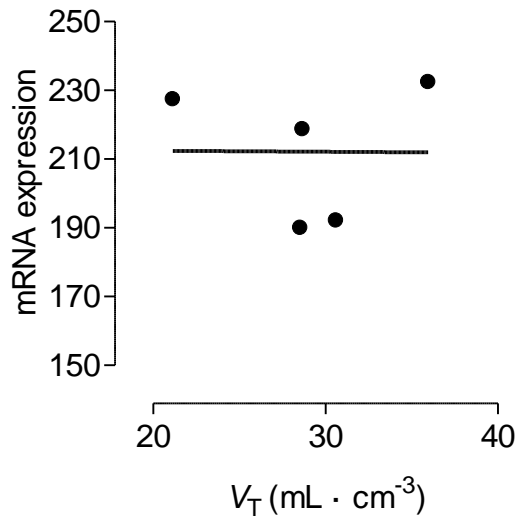

**Supplemental Figure 3.** Linear regression between OGA gene transcript *MGEA5* from postmortem human brain (Allen Brain Atlas) and OGA protein in monkey brain, measured with positron emission tomography (PET) and expressed as total distribution volume ( $V_T$ ) for <sup>18</sup>F-LSN3316612. The five brain regions (frontal cortex, occipital cortex, amygdala, hippocampus, and striatum) provided by the Allen Brain Atlas showed no correlation between expressed protein and gene transcript for any of the four gene transcripts provided.

Supplemental Figure 4

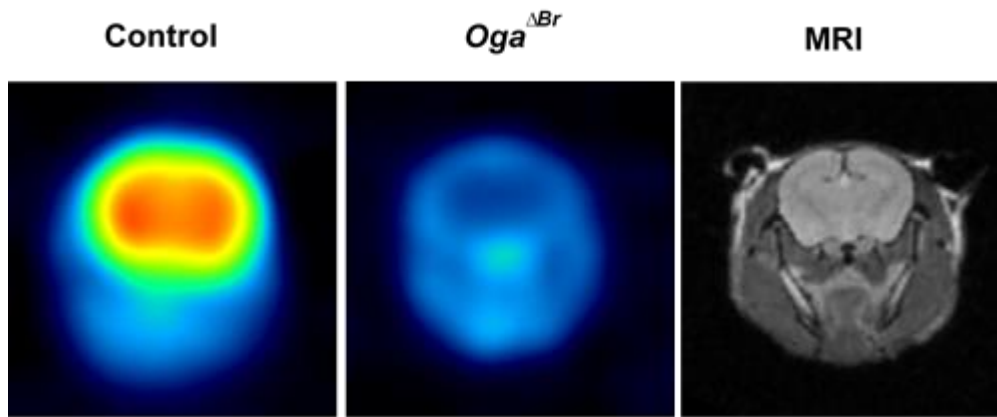

Supplemental Figure 4. PET images of control (left) and *Oga*<sup>ΔBr</sup> (middle) mice brain.

Supplemental Figure 5

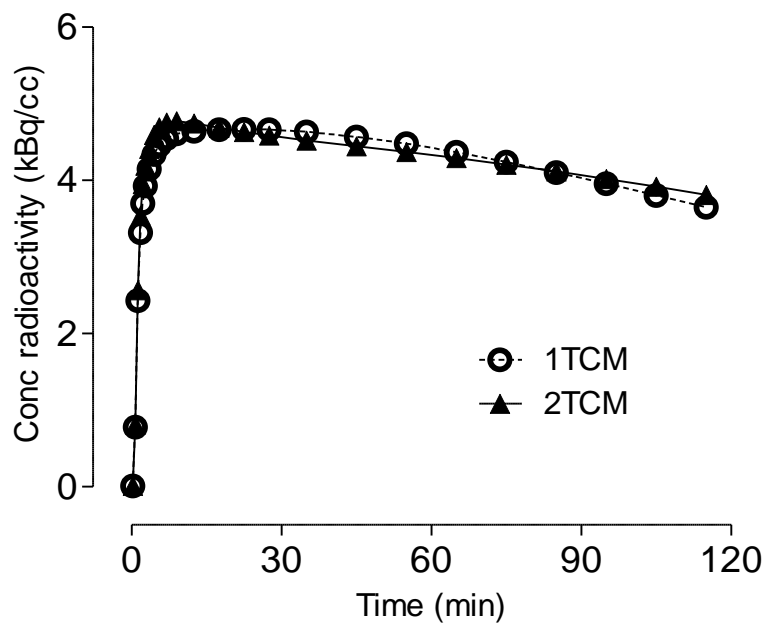

Supplemental Figure 5: Time-activity curves from monkey cerebellum using an unconstrained two-tissue compartment model (2TCM ●) and a one-tissue compartment model and (1TCM model ○)

**Supplemental Table 1:** Decrease of  $^{18}\text{F}$ -LSN3316612 uptake in regions of monkey brain after blockade by nonradioactive LSN3316612

| Region             | $V_T$ (mL·cm $^{-3}$ ) |         | Decrease (%) |
|--------------------|------------------------|---------|--------------|
|                    | Baseline               | Blocked |              |
| Whole brain        | 25.1                   | 2.2     | 91           |
| Frontal cortex     | 28.5                   | 2.8     | 90           |
| Anterior cingulate | 31.8                   | 2.1     | 93           |
| Striatum           | 30.6                   | 2.0     | 93           |
| Insula             | 30.1                   | 1.9     | 94           |
| Temporal cortex    | 27.5                   | 2.0     | 93           |
| Amygdala           | 36.0                   | 2.0     | 94           |
| Hippocampus        | 28.7                   | 2.0     | 93           |
| Thalamus           | 23.5                   | 1.9     | 92           |
| Parietal cortex    | 24.2                   | 2.3     | 90           |
| Occipital cortex   | 21.1                   | 2.1     | 90           |
| Cerebellum         | 18.7                   | 1.9     | 90           |
| Pituitary          | 25.6                   | 1.7     | 93           |

Radioligand binding was quantified as total distribution volume ( $V_T$ ) in each brain region at baseline and after blockade with LSN3316612 (1 mg/kg i.v. 45 minutes before the radioligand). The two scans were performed in the same animal on two different days.

**Supplemental Table 2.** Radiation dosimetry estimates for <sup>18</sup>F-LSN3316612 from one male and one female monkey

---

| <b>Organ</b>               | <b>Radiation dose (μSv/MBq)</b> |
|----------------------------|---------------------------------|
| Adrenals                   | 15.9                            |
| Brain                      | 27.0                            |
| Breasts                    | 13.2                            |
| Gallbladder Wall           | 16.3                            |
| Lower Large Intestine Wall | 15.4                            |
| Small Intestine            | 22.6                            |
| Stomach Wall               | 14.0                            |
| Upper Large Intestine Wall | 15.4                            |
| Heart Wall                 | 28.4                            |
| Kidneys                    | 46.5                            |
| Liver                      | 27.6                            |
| Lungs                      | 22.9                            |
| Muscle                     | 11.8                            |
| Ovaries                    | 14.4                            |
| Pancreas                   | 16.2                            |
| Red Marrow                 | 15.0                            |
| Osteogenic Cells           | 20.5                            |
| Skin                       | 9.0                             |
| Spleen                     | 38.0                            |
| Testes                     | 41.1                            |
| Thymus                     | 13.1                            |
| Thyroid                    | 13.6                            |
| Urinary Bladder Wall       | 27.8                            |
| Uterus                     | 17.9                            |
| <b>Effective dose</b>      | <b>22.0</b>                     |

---

Dosimetry was estimated for a 70-kg human subject based on whole-body imaging in one male and one female monkey. Doses to sex organs derived from only one animal, but doses to non-sex organs were averaged between the two monkeys.
